## Index of Authors and Titles

- BECHTOL, K. B., HO., W. C. *and* VAUPEL, S. Biochemical characterization of the adhesion-related differentiation antigen XT-1 197
- BELL, H. *See* VAN BLERKOM, J.
- BELL, K. M. The preliminary characterization of mitogens secreted by embryonic chick wing bud tissues *in vitro* 257
- BRYANT, S. V. *See* MUNEOKA, K.
- BULLEIT, R. F. *and* ZIMMERMAN, E. F. The effect of reducing ATP levels on reorientation of the secondary palate 73
- DE PETROCELLIS, B. *See* DE PETROCELLIS, L.
- DE PETROCELLIS, L., MAHARAJAN, V., DE PETROCELLIS, B. *and* MINEI, R. Bud induction in decapitated *Hydra attenuata* by 5-azacytidine: a morphological study 105
- DESMOND, M. E. *See* GOLDSTEIN, C. D.
- EGLITIS, M. A. *See* SHERMAN, M. I.
- GOLDSTEIN, C. D., JANKIEWICZ, J. J. *and* DESMOND, M. E. Identification of glycosaminoglycans in the chondrocranium of the chick embryo before and at the onset of chondrogenesis 29
- GOLINSKA, K. Modifications of size and pattern of microtubular organelles in overfed cells of a ciliate *Dileptus* 85
- GUTZEIT, H. O. *and* HUEBNER, E. Comparison of microfilament patterns in nurse cells of different insects with polytrophic and telotrophic ovarioles 291
- HALL, B. K. The role of movement and tissue interactions in the development and growth of bone and secondary cartilage in the clavicle of the embryonic chick 133
- HISCOCK, J. *and* STRAZNICKY, C. The formation of axonal projections of the mesencephalic trigeminal neurones in chick embryos 281
- HO, W. C. *See* BECHTOL, K. B.
- HOLLER-DINSMORE, G. V. *See* MUNEOKA, K.
- HUEBNER, E. *See* GUTZEIT, H. O.
- JANKIEWICZ, J. J. *See* GOLDSTEIN, C. D.
- JOHNSON, M. H., MARO, B. *and* TAKEICHI, M. The role of cell adhesion in the synchronization and orientation of polarization in 8-cell mouse blastomeres 239
- MAHARAJAN, V. *See* DE PETROCELLIS, L.
- MARO, B. *See* JOHNSON, M. H.
- MINEI, R. *See* DE PETROCELLIS, L.
- MUNEOKA, K., HOLLER-DINSMORE, G. V. *and* BRYANT, S. V. Pattern discontinuity, polarity and directional intercalation in axolotl limbs 51
- MCCAIG, C. D. Myoblasts and notochord influence the orientation of somitic myoblasts from *Xenopus laevis* 121
- PONDER, B. A. J. *See* SCHMIDT, G. H.
- SCHMIDT, G. H., WILKINSON, M. M. *and* PONDER, B. A. J. Clonal analysis of chimaeric patterns in aortic endothelium 267
- SHERMAN, M. I., EGLITIS, M. A. *and* THOMAS, R. Reversible and irreversible effects of retinol upon the phenotypic properties of embryonal carcinoma cells 179
- SMEDLEY, M. J. *and* STANISSTREET, M. Calcium and neurulation in mammalian embryos. II. Effects of cytoskeletal inhibitors and calcium antagonists on the neural folds of rat embryos 167
- STANISSTREET, M. *See* SMEDLEY, M. J.

STRAZNICKY, C. *See* HISCOCK, J.

STUERMER, C. A. O. Pathways of regenerated retinotectal axons in goldfish. I. Optic nerve, tract and tectal fascicle layer 1

SUNKEL, C. E. *See* WHITTLE, J. R. S.

TAKEICHI, M. *See* JOHNSON, M. H.

THOMAS, R. *See* SHERMAN, M. I.

TIONG, S. Y. K. *See* WHITTLE, J. R. S.

VAN BLERKOM, J. *and* BELL, H. Regulation of development in the fully grown mouse oocyte: chromosome-mediated temporal and spatial differentiation of the cytoplasm and plasma membrane 213

VAUPEL, S. *See* BECHTOL, K. B.

WHITTLE, J. R. S., TIONG, S. Y. K. *and* SUNKEL, C. E. The effect of lethal mutations and deletions within the bithorax complex upon the identity of caudal metameres in the *Drosophila* embryo 153

WILKINSON, M. M. *See* SCHMIDT, G. H.

ZIMMERMAN, E. F. *See* BULLEIT, R. F.
